# Supplementary material for: Determination of DDT in honey samples by liquid–liquid extraction with low-temperature purification (LLE-LTP) combined to HPLC-DAD
Source: Royal Society of Chemistry journal article supplement (doi:10.1039/d1ay00264c), 2021-01-01
Supplement: d1ay00264c1.pdf [file d1ay00264c1.pdf]

*Analytical Methods*

**Electronic Supplementary Information – ESI †**

**Determination of DDT in Honey Samples by Liquid-Liquid Extraction with Low-Temperature Purification (LLE-LTP) Combined to HPLC-DAD**

Lucas Victor Pereira de Freitas,<sup>a</sup> Lorena Maria Guimarães Alves,<sup>b</sup> Lázaro Chaves Sicupira,<sup>c</sup> Gevany Paulino de Pinho,<sup>d</sup> Flaviano Oliveira Silvério<sup>d\*</sup>

<sup>a</sup> Department of Physics and Chemistry, School of Pharmaceutical Sciences of Ribeirão Preto, Universidade de São Paulo, Ribeirão Preto, São Paulo, Brazil

<sup>b</sup> Department of Chemistry, Universidade Federal dos Vales do Jequitinhonha e Mucuri, Diamantina, Minas Gerais, Brazil

<sup>c</sup> Institute of Engineering, Science and Technology, Universidade Federal dos Vales do Jequitinhonha e Mucuri, Janaúba, Minas Gerais, Brazil

<sup>d</sup> Institute of Agricultural Sciences, Universidade Federal de Minas Gerais, Montes Claros, Minas Gerais, Brazil

\*Corresponding Author

E-mail: flavianosilverio@ufmg.br

<https://orcid.org/0000-0002-5753-8739>

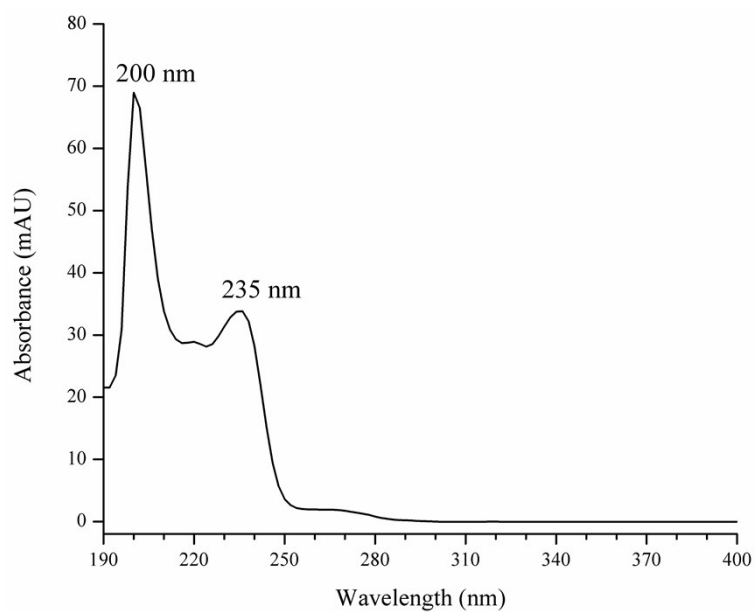

**Fig. S1** Absorption spectrum in the ultraviolet region of the DDT standard solution at 1.0 mg L<sup>-1</sup>

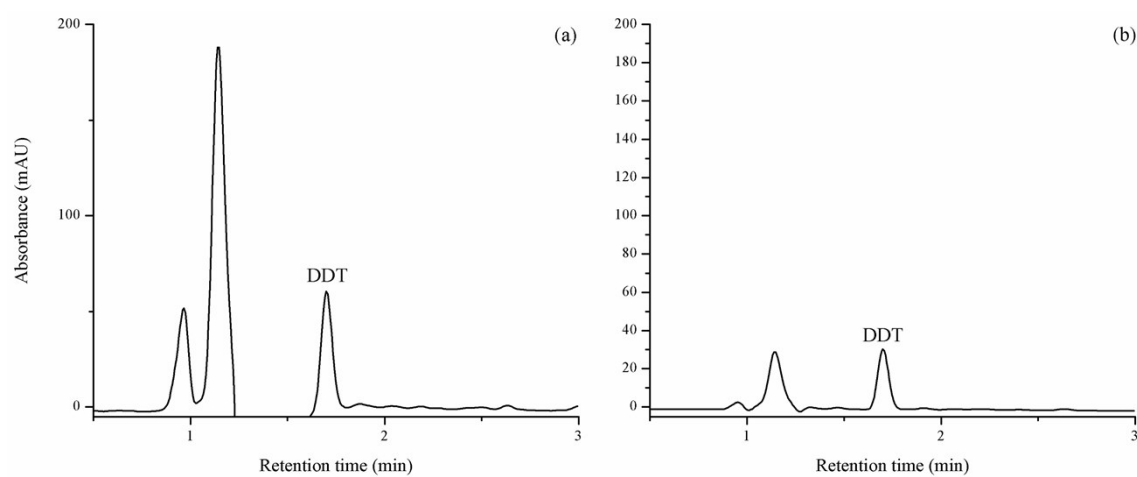

**Fig. S2** Chromatograms of the DDT standard solution at 1.0 mg L<sup>-1</sup>. Poroshell column, mobile phase MeOH:H<sub>2</sub>O = 100:0 v/v, flow rate = 0.5 mL min<sup>-1</sup>, column temperature = 30 °C and  $\lambda$  = (a) 200 and (b) 235 nm

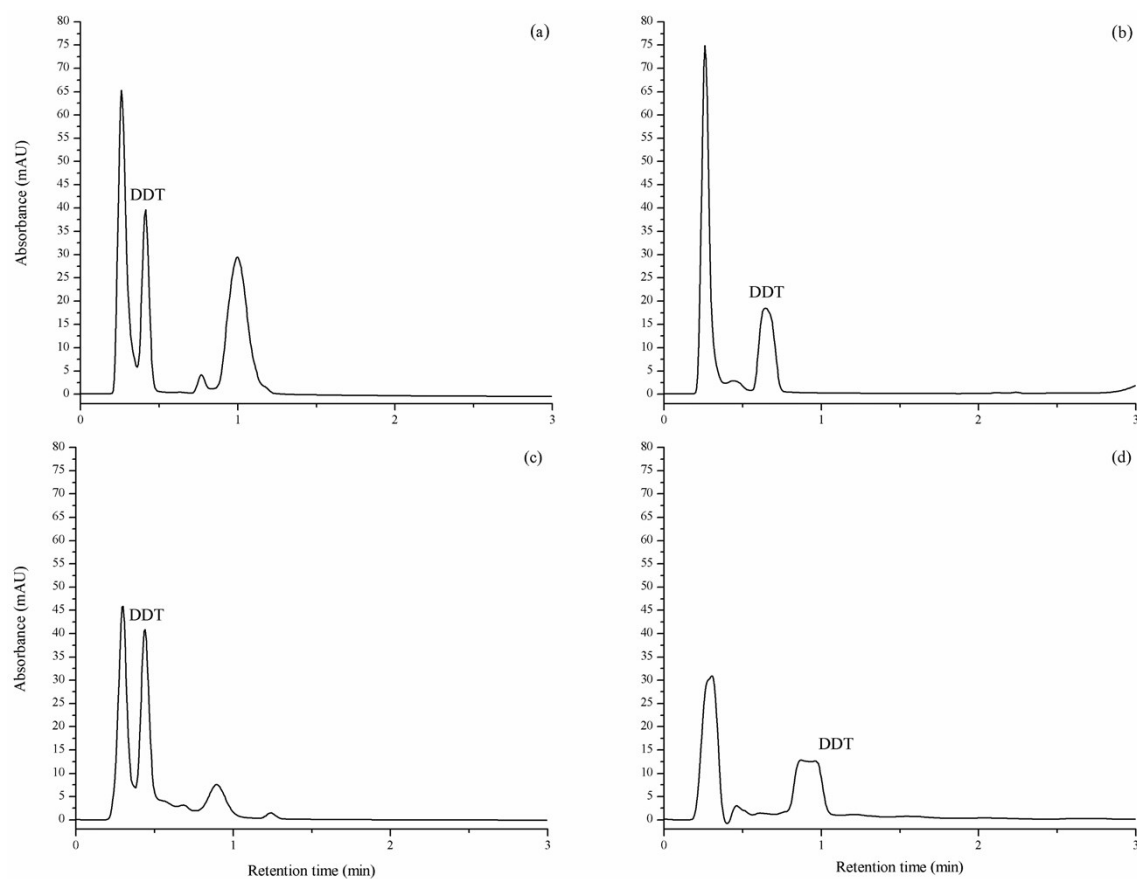

**Fig. S3** Chromatograms of the DDT standard solution at  $1.0 \text{ mg L}^{-1}$ . Zorbax column, flow rate =  $0.5 \text{ mL min}^{-1}$ , column temperature =  $30 \text{ }^\circ\text{C}$ ,  $\lambda = 235 \text{ nm}$ , mobile phase composed of (a) ACN:H<sub>2</sub>O = 100:0 (v/v), (b) ACN:H<sub>2</sub>O = 90:10 (v/v), (c) MeOH:H<sub>2</sub>O = 100:0 (v/v) and (d) MeOH:H<sub>2</sub>O = 90:10 (v/v)

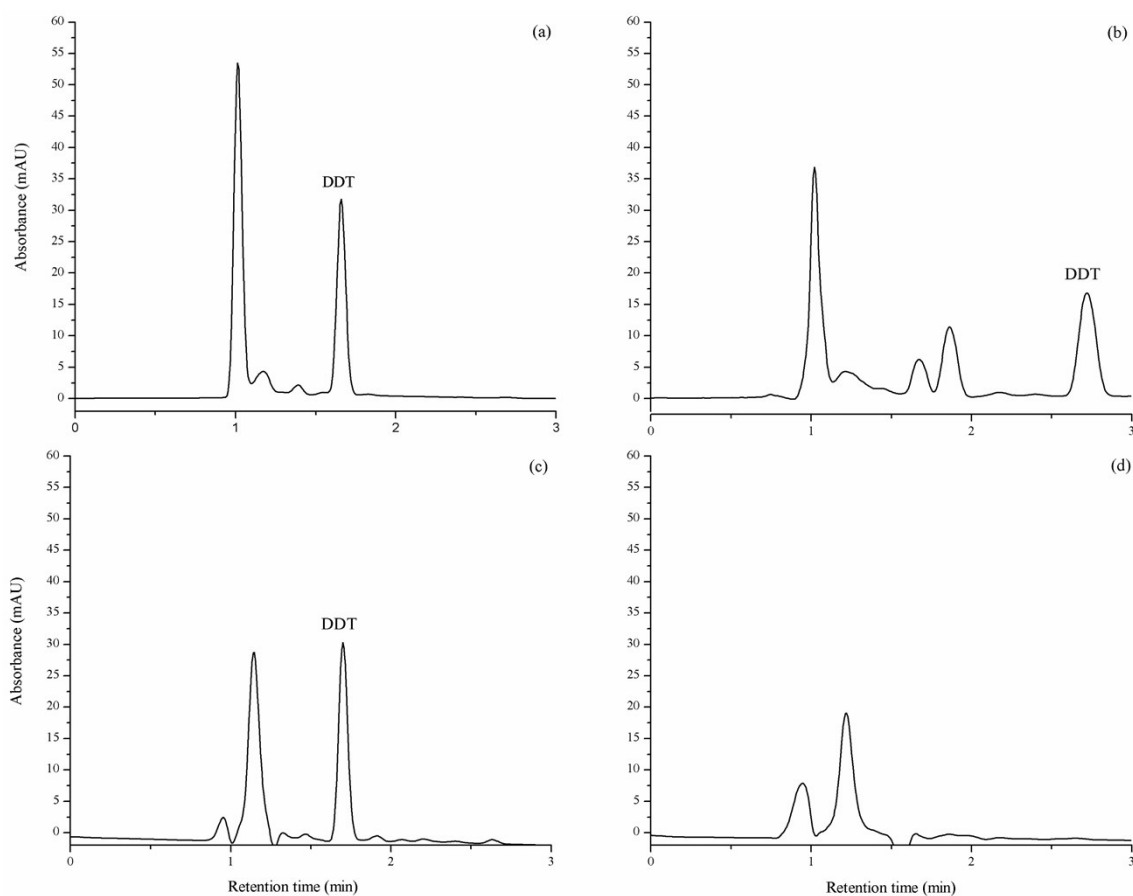

**Fig. S4** Chromatograms of the DDT standard solution at  $1.0 \text{ mg L}^{-1}$ . Poroshell column, flow rate =  $0.5 \text{ mL min}^{-1}$ , column temperature =  $30 \text{ }^\circ\text{C}$ ,  $\lambda = 235 \text{ nm}$ , mobile phase composed of (a) ACN:H<sub>2</sub>O = 100:0 (v/v), (b) ACN:H<sub>2</sub>O = 90:10 (v/v), (c) MeOH:H<sub>2</sub>O = 100:0 (v/v) and (d) MeOH:H<sub>2</sub>O = 90:10 (v/v)

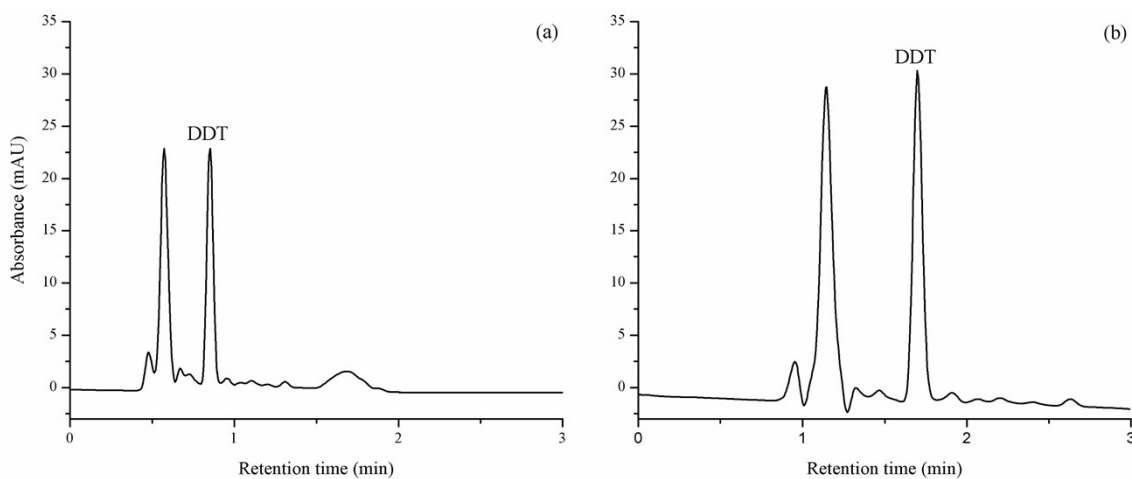

**Fig. S5** Chromatograms of the DDT standard solution at 1.0 mg L<sup>-1</sup>. Poroshell column, mobile phase MeOH:H<sub>2</sub>O = 100:0 v/v, column temperature = 30 °C,  $\lambda$  = 235 nm, flow rate = (a) 1.0 mL min<sup>-1</sup> and (b) 0.5 mL min<sup>-1</sup>

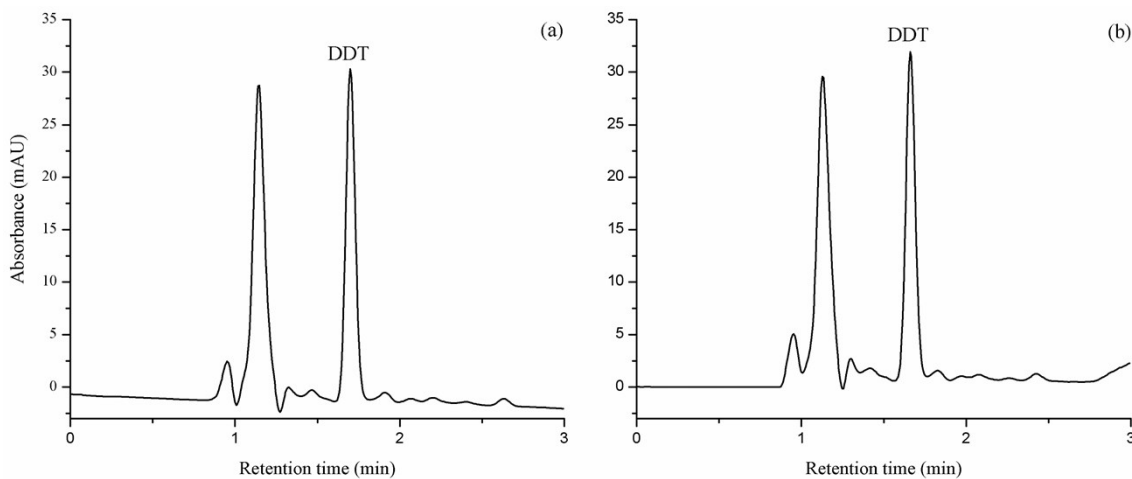

**Fig. S6** Chromatograms of the DDT standard solution at 1.0 mg L<sup>-1</sup>. Poroshell column, mobile phase MeOH:H<sub>2</sub>O = 100:0 v/v, flow rate = 0.5 mL min<sup>-1</sup>,  $\lambda$  = 235 nm and column temperature = (a) 30 °C and (b) 40 °C

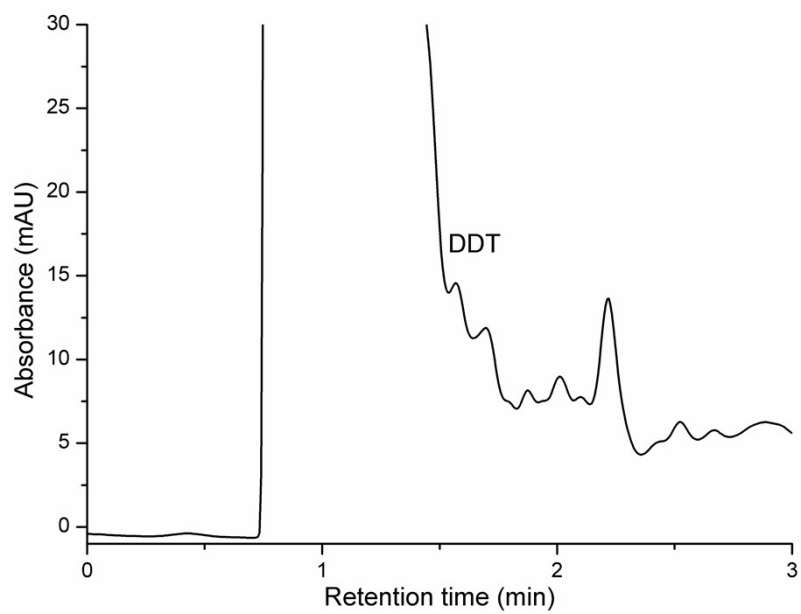

**Fig. S7** Chromatogram of spiked extract with DDT at  $8 \mu\text{gkg}^{-1}$ , corresponding to the LOQ

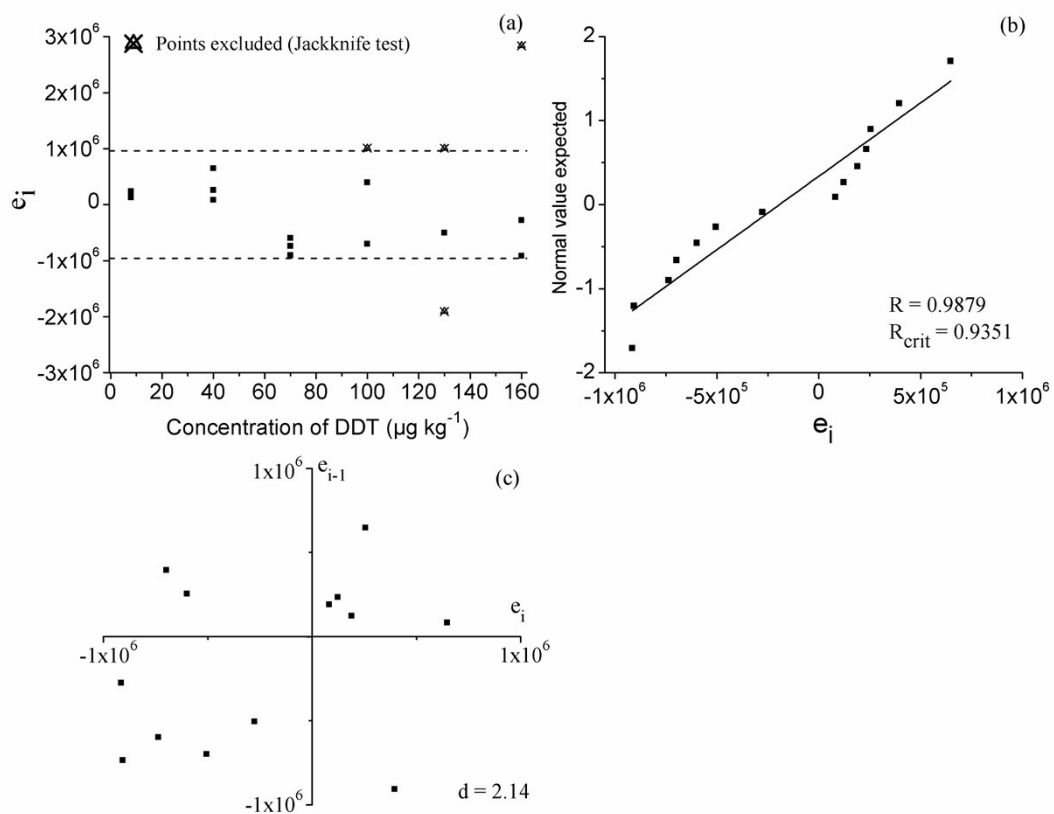

**Fig. S8** Obtained graphs in the linearity assessment of the LLE-LTP method. (a) Linear regression residuals after the exclusion of extreme values by the Jackknife test, (b) normal probability of regression residuals by the Ryan-Joiner test and (c) Autocorrelation of regression residuals by the Durbin-Watson test.  $e_i$ , residual;  $R$ , correlation coefficient of Ryan-Joiner test;  $d$ , Durbin-Watson statistics

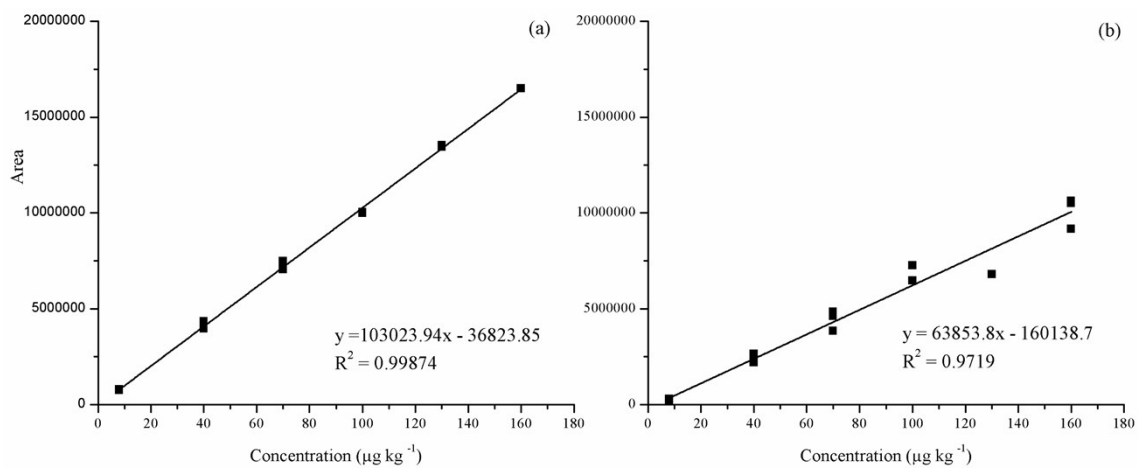

**Fig. S9** Analytical curves of DDT solutions in (a) acetonitrile and (b) matrix extracts.  $R^2$ , determination coefficient
